# Supplementary material
Source: PubMed Central journal article supplement (PMC7700730)
Supplement: mmc1.pdf [file mmc1.pdf]

**Scrutinizing the SARS-CoV-2 protein information for designing an effective vaccine encompassing both the T-cell and B-cell epitopes**

**Neha Jain<sup>¶</sup>, Uma Shankar<sup>¶</sup>, Prativa Majee<sup>¶</sup>, Amit Kumar\***

Discipline of Biosciences and Biomedical Engineering, Indian Institute of Technology Indore, Indore, Simrol, Indore, 453552, India

<sup>¶</sup>These authors contributed equally to this work

\*To whom correspondence should be addressed.

**Amit Kumar**, Discipline of Biosciences and Biomedical Engineering, Indian Institute of Technology-Indore, Indore, Simrol - 453 552, India, Contact - +91-732-430-6771, Email: amitek@iiti.ac.in

## **SUPPLEMENTARY METHOD**

### **Retrieval of SARS-CoV-2 proteome**

The complete proteome of latest reported novel Wuhan strain of SARS Coronavirus (SARS-CoV-2) was downloaded from the Nucleotide database available at National Center for Biotechnology Information (NCBI).

### **Antigenicity prediction in the Coronavirus proteome**

For the antigenic analysis of the proteome of COVID-19 strain, VaxiJen v2.0 server available at <http://www.ddg-pharmfac.net/vaxijen/VaxiJen/VaxiJen.html> was used [1]. For antigenicity prediction of the proteins of SARS-CoV-2 with higher accuracy, Virus model available at the VaxiJen server with a threshold of 0.4 was utilized.

### **Selection of MHC I and MHC II alleles**

MHC class I and II alleles were selected on the basis of their occurrence worldwide. We focused specially on the countries which are severely affected by the deadly SARS-CoV-2 strain. For MHC class I, following 14 HLA alleles A01:01, A02:01, A02:03, A02:06, A03:01, A11:01, A24:02, A31:01, A33:01, B07:02, B35:01, B51:01, B54:01, B58:01 were used. For MHC-II, DRB1\_0101, DRB1\_0301, DRB1\_0401, DRB1\_0405, DRB1\_0701, DRB1\_0802, DRB1\_0901, DRB1\_1101, DRB1\_1201, DRB1\_1302, DRB1\_1501, DPA10103-DPB10101, DPA10201-DPB10201, DPA10301-DPB10301, DQA10101-DQB10201, DQA10301-DQB10301, DQA10401-DQB10401, DQA10501-DQB10501, DQA10102-DQB10202, DQA10402-DQB10402 were used for the epitope screening.

### **Helper T cell epitope prediction**

Various online servers were explored for the accurate prediction of Helper T Lymphocytes (HTL) epitopes. Firstly, the antigenic proteins were analysed by using NetMHCIIpanv3.2 server (<http://www.cbs.dtu.dk/services/NetMHCIIpan/>) [2]. The server provides the epitope predictions for three human MHC class II isotypes that includes HLA-DR, HLA-DP and HLA-DQ. We explored NetMHCIIpan server for HTL epitope predictions for the selected 20 MHC class II alleles. The length for the HTL epitopes was kept 15 mer. The server predicts the binding affinity

of the epitopes with the respective HLA allele and provides an IC<sub>50</sub> (in nanoMolar) and %Rank for each MHC class II allele – epitope pair which was utilized for initial screening of the potential HTL epitopes.

The predicted strong binders were further analysed by MHCII binding prediction tool available at IEDB server (<http://tools.immuneepitope.org/mhcii/>)[3].

### **Cytotoxic T cell epitope prediction**

For Cytotoxic T cell (CTL) epitope prediction, NetMHCPan 4.0 [4] based on artificial neural network (ANN) was utilized for the 14 selected HLA class I molecules. The predicted strong binders were then checked for their antigenicity by using VaxiJen server. Further, immunogenicity of the epitopes was checked using class I Immunogenicity tool available at IEDB server (<http://tools.iedb.org/immunogenicity/>)[5].

### **Epitope Conservation analysis**

The presence of selected best epitopes in all the reported human infecting SARS-coronavirus strain were checked by using Epitope Conservancy Analysis tool of IEDB (<http://tools.iedb.org/conservancy/>) [6].

### **Molecular interaction of the HLA-epitope pair**

The MHC class I and class II molecules were downloaded from RCSB PDB database (<https://www.rcsb.org/>). Those that were not available in PDB database were retrieved from pHLA database (<https://www.phla3d.com.br/>) [7]. The structures of the SARS-CoV-2 proteins were constructed using I-TASSER (<https://zhanglab.ccmb.med.umich.edu/I-TASSER/>) [8], HTL and CTL epitopes were mapped and their structures were retrieved using PyMol tool. For the molecular interaction analysis of the predicted best HLA-epitope pairs for both MHC class I and class II alleles, ClusPro protein-protein docking tool (<https://cluspro.org/login.php>) [9] was utilized.

### **B-Cell epitope prediction**

ABCpred tool based on artificial neural network was explored for B-cell epitope prediction (<https://webs.iiitd.edu.in/raghava/abcpred/index.html>)[10]. For higher accuracy, the threshold for the prediction was kept 0.90.

### **Designing of Vaccine construct**

For constructing a multi-epitope vaccine construct, the selected best HTL, CTL and B-cell epitopes were joined by using various linkers. Four adjuvants namely,  $\beta$ -defensin, universal memory T cell helper peptide (TpD), PADRE sequence and a M cell ligand were also added to the vaccine construct.

### **Antigenicity, allergenicity and toxicity analysis of the epitopes and vaccine construct:**

The antigenicity of the selected high affinity HTL, CTL and B-cell epitopes and the vaccine construct was analyzed using VaxiJen server. For the allergenicity analysis, three different tools namely AlgPred (<https://webs.iiitd.edu.in/raghava/algpred/submission.html>) [11], AllerTop (<https://www.ddg-pharmfac.net/AllerTOP/method.html>) [12] and AllergenFP v.1.0 (<http://ddg-pharmfac.net/AllergenFP/index.html>)[13] were utilized. Thereafter, toxic nature of the epitopes and the vaccine construct was checked by utilizing the ToxinPred server ([https://webs.iiitd.edu.in/raghava/toxinpred/motif\\_scan.php](https://webs.iiitd.edu.in/raghava/toxinpred/motif_scan.php)) [14].

### **Population coverage of the vaccine construct**

To check the population coverage of the vaccine construct, Population coverage tool available at IEDB (<http://tools.iedb.org/population/>)[15] server was utilized. The HLA class I and class II alleles in the final construct were entered in the tool and the population coverage of the alleles were calculated for the top 26 countries that are severely affected by the SARS-COV-2 virus.

### **Physiochemical property analyses of the multi-epitope vaccine construct**

ExPASy's ProtParam (<https://web.expasy.org/protparam/>)[16] was explored for the physiochemical properties evaluation of the vaccine construct. Solubility of the construct was

calculated using SolPro tool available at SCRATCH protein predictor server (<http://scratch.proteomics.ics.uci.edu/>) [17].

### **Vaccine construct structure prediction and validation**

Secondary structure of the multi-epitope vaccine construct was predicted using SOPMA([https://npsa-prabi.ibcp.fr/cgi-bin/npsa\\_automat.pl?page=/NPSA/npsa\\_sopma.html](https://npsa-prabi.ibcp.fr/cgi-bin/npsa_automat.pl?page=/NPSA/npsa_sopma.html)) [18] and PSI-PRED (<http://bioinf.cs.ucl.ac.uk/psipred/>) server [19]. For the tertiary structure prediction of the vaccine construct Robetta server (<http://rosetta.bakerlab.org/>) based on *ab-initio* and homology modelling was utilized [20]. The predicted structure was refined by using 3D Refine (<http://sysbio.rnet.missouri.edu/3Drefine/>) [21] and further by GalaxyRefine (<http://galaxy.seoklab.org/cgi-bin/submit.cgi?type=REFINE>) [22]. The structures were evaluated by using RAMPAGE (<http://mordred.bioc.cam.ac.uk/~rapper/rampage.php>) and ERRAT server (<https://servicesn.mbi.ucla.edu/ERRAT/>).

### **Standard molecular dynamics of the vaccine construct**

The refined modelled structure of the multi-epitope vaccine construct was further evaluated for its stability in the real environment by simulating it in a water sphere using NAMD-standard molecular dynamics tool (<https://www.ks.uiuc.edu/Research/namd/>). The required structure files (.psf) were generated by psfgen using Visual Molecular Dynamics (VMD) tool v.1.9.3 by utilizing CHARMM force fields for proteins. Initially, a 10000 steps energy minimization was performed followed by subsequent heating the system from 0 K to 310 K. Thereafter, a 10 ns standard molecular dynamics was performed and trajectory DCD file generated was evaluated.

### **Interaction analysis of Vaccine construct with immune system molecules and there MD analysis**

To check the interaction of the multi-epitope vaccine construct with two immuno-receptors, TLR-3 and TLR-8, ClusPro docking server was used and the resultant best complexes were then simulated for 10 ns in a water sphere using NAMD.

### **Codon optimization and *In-silico* cloning**

For the expression and isolation of the constructed multi-epitope vaccine in *Escherichia coli* K12 strain, the construct was first converted to cDNA using Reverse translate tool available at ExPasy server. The resultant DNA was further optimized using JCAT server [23]. Finally, the cDNA construct was inserted into the pET28a (+) vector using *HindIII* and *BamHI* restriction sites.

### Supplementary References

- [1] Doytchinova IA, Flower DR. VaxiJen: a server for prediction of protective antigens, tumour antigens and subunit vaccines. *BMC bioinformatics*. 2007;8:4.
- [2] Karosiene E, Rasmussen M, Blicher T, Lund O, Buus S, Nielsen M. NetMHCIIpan-3. 0, a common pan-specific MHC class II prediction method including all three human MHC class II isotypes, HLA-DR, HLA-DP and HLA-DQ. *Immunogenetics*. 2013;65:711-24.
- [3] Sidney J, Assarsson E, Moore C, Ngo S, Pinilla C, Sette A, et al. Quantitative peptide binding motifs for 19 human and mouse MHC class I molecules derived using positional scanning combinatorial peptide libraries. *Immunome research*. 2008;4:2.
- [4] Jurtz V, Paul S, Andreatta M, Marcatili P, Peters B, Nielsen M. NetMHCpan-4.0: improved peptide–MHC class I interaction predictions integrating eluted ligand and peptide binding affinity data. *The Journal of Immunology*. 2017;199:3360-8.
- [5] Calis JJ, Maybeno M, Greenbaum JA, Weiskopf D, De Silva AD, Sette A, et al. Properties of MHC class I presented peptides that enhance immunogenicity. *PLoS computational biology*. 2013;9.
- [6] Bui H-H, Sidney J, Li W, Fusseder N, Sette A. Development of an epitope conservancy analysis tool to facilitate the design of epitope-based diagnostics and vaccines. *BMC bioinformatics*. 2007;8:361.
- [7] Liu T, Pan X, Chao L, Tan W, Qu S, Yang L, et al. Subangstrom accuracy in pHLA-I modeling by Rosetta FlexPepDock refinement protocol. *Journal of chemical information and modeling*. 2014;54:2233-42.
- [8] Zhang Y. I-TASSER server for protein 3D structure prediction. *BMC bioinformatics*. 2008;9:40.
- [9] Comeau SR, Gatchell DW, Vajda S, Camacho CJ. ClusPro: a fully automated algorithm for protein–protein docking. *Nucleic acids research*. 2004;32:W96-W9.
- [10] Saha S, Raghava GPS. Prediction of continuous B-cell epitopes in an antigen using recurrent neural network. *Proteins: Structure, Function, and Bioinformatics*. 2006;65:40-8.
- [11] Saha S, Raghava G. AlgPred: prediction of allergenic proteins and mapping of IgE epitopes. *Nucleic acids research*. 2006;34:W202-W9.
- [12] Dimitrov I, Flower DR, Doytchinova I. AllerTOP-a server for in silico prediction of allergens. *BMC bioinformatics: BioMed Central*; 2013. p. S4.
- [13] Dimitrov I, Naneva L, Doytchinova I, Bangov I. AllergenFP: allergenicity prediction by descriptor fingerprints. *Bioinformatics*. 2014;30:846-51.
- [14] Gupta S, Kapoor P, Chaudhary K, Gautam A, Kumar R, Open Source Drug Discovery C, et al. In Silico Approach for Predicting Toxicity of Peptides and Proteins. *PLOS ONE*. 2013;8:e73957.
- [15] Bui H-H, Sidney J, Dinh K, Southwood S, Newman MJ, Sette A. Predicting population coverage of T-cell epitope-based diagnostics and vaccines. *BMC bioinformatics*. 2006;7:153.
- [16] Gasteiger E, Hoogland C, Gattiker A, Wilkins MR, Appel RD, Bairoch A. Protein identification and analysis tools on the ExPASy server. *The proteomics protocols handbook*: Springer; 2005. p. 571-607.
- [17] Cheng J, Randall AZ, Sweredoski MJ, Baldi P. SCRATCH: a protein structure and structural feature prediction server. *Nucleic acids research*. 2005;33:W72-W6.
- [18] Geourjon C, Deleage G. SOPMA: significant improvements in protein secondary structure prediction by consensus prediction from multiple alignments. *Bioinformatics*. 1995;11:681-4.

- [19] McGuffin LJ, Bryson K, Jones DT. The PSIPRED protein structure prediction server. *Bioinformatics*. 2000;16:404-5.
- [20] Kim DE, Chivian D, Baker D. Protein structure prediction and analysis using the Robetta server. *Nucleic acids research*. 2004;32:W526-W31.
- [21] Bhattacharya D, Nowotny J, Cao R, Cheng J. 3Drefine: an interactive web server for efficient protein structure refinement. *Nucleic acids research*. 2016;44:W406-W9.
- [22] Heo L, Park H, Seok C. GalaxyRefine: protein structure refinement driven by side-chain repacking. *Nucleic acids research*. 2013;41:W384-W8.
- [23] Grote A, Hiller K, Scheer M, Münch R, Nörtemann B, Hempel DC, et al. JCat: a novel tool to adapt codon usage of a target gene to its potential expression host. *Nucleic acids research*. 2005;33:W526-W31.

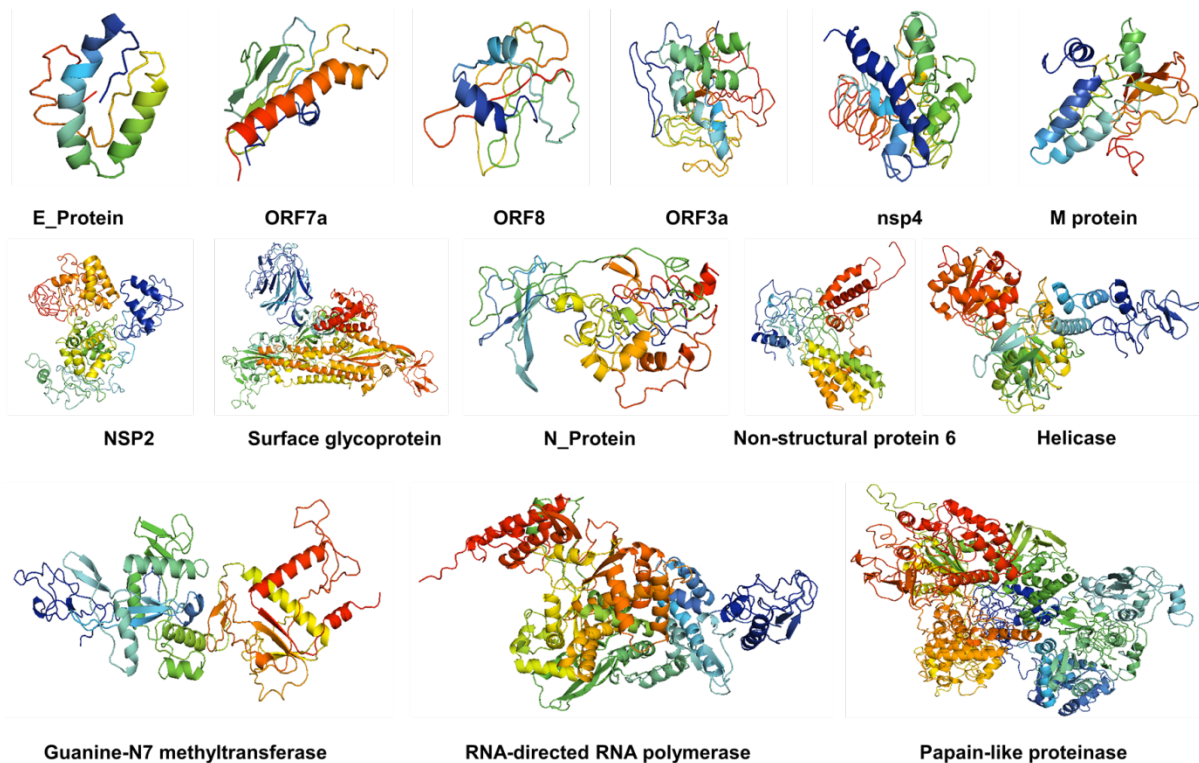

**Supplementary Figure S1. Three dimensional structures in ribbon illustration of the modelled SARS-CoV-2 proteins as predicted by I-TASSER. The Figures are generated using Pymol visualization tool.**

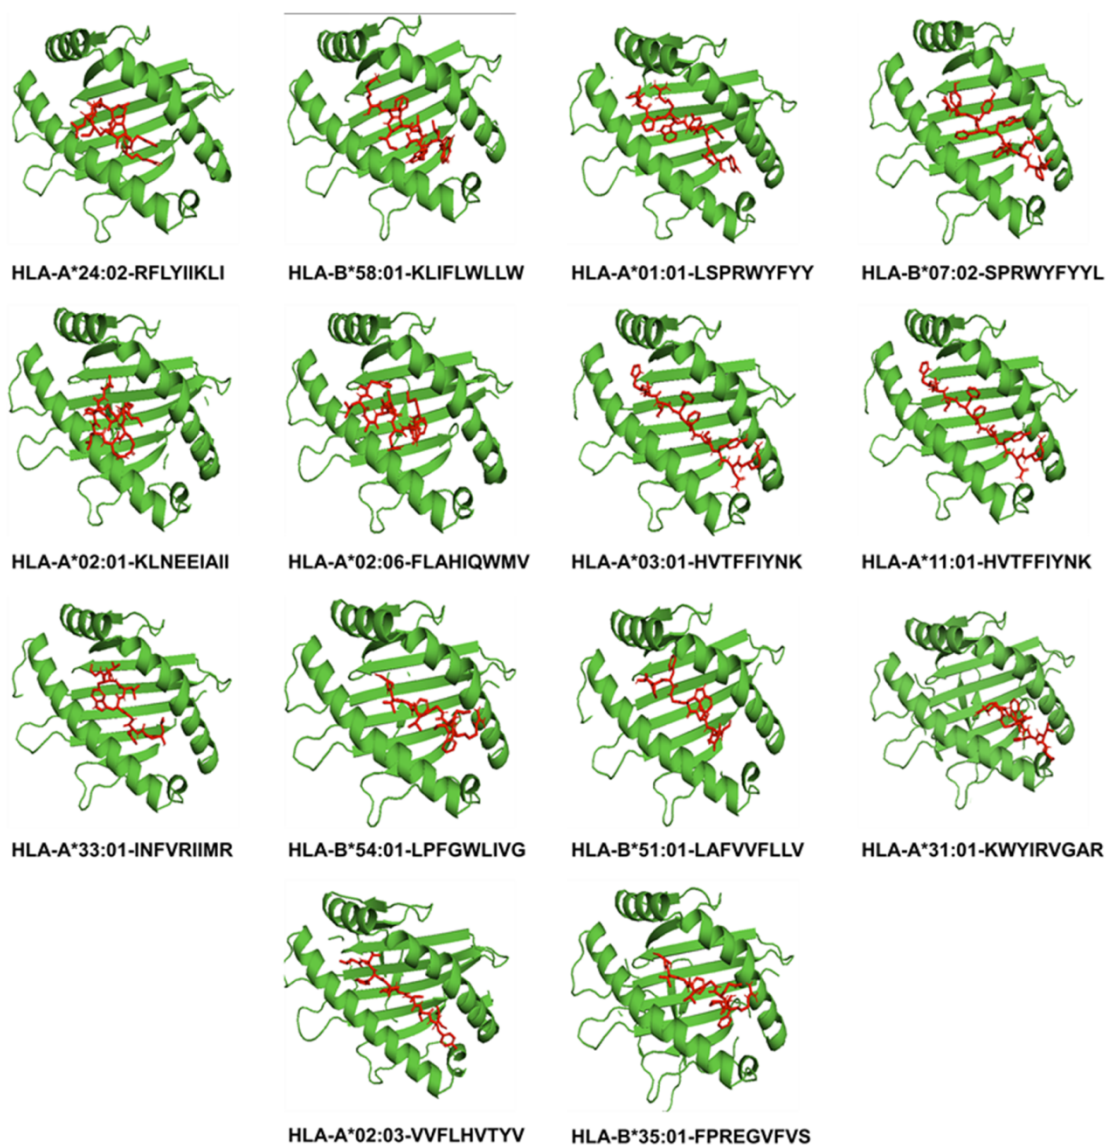

**Supplementary Figure S2a: The molecular interaction of the screened CTL epitopes with the epitope binding groove of HLA-I molecules.**



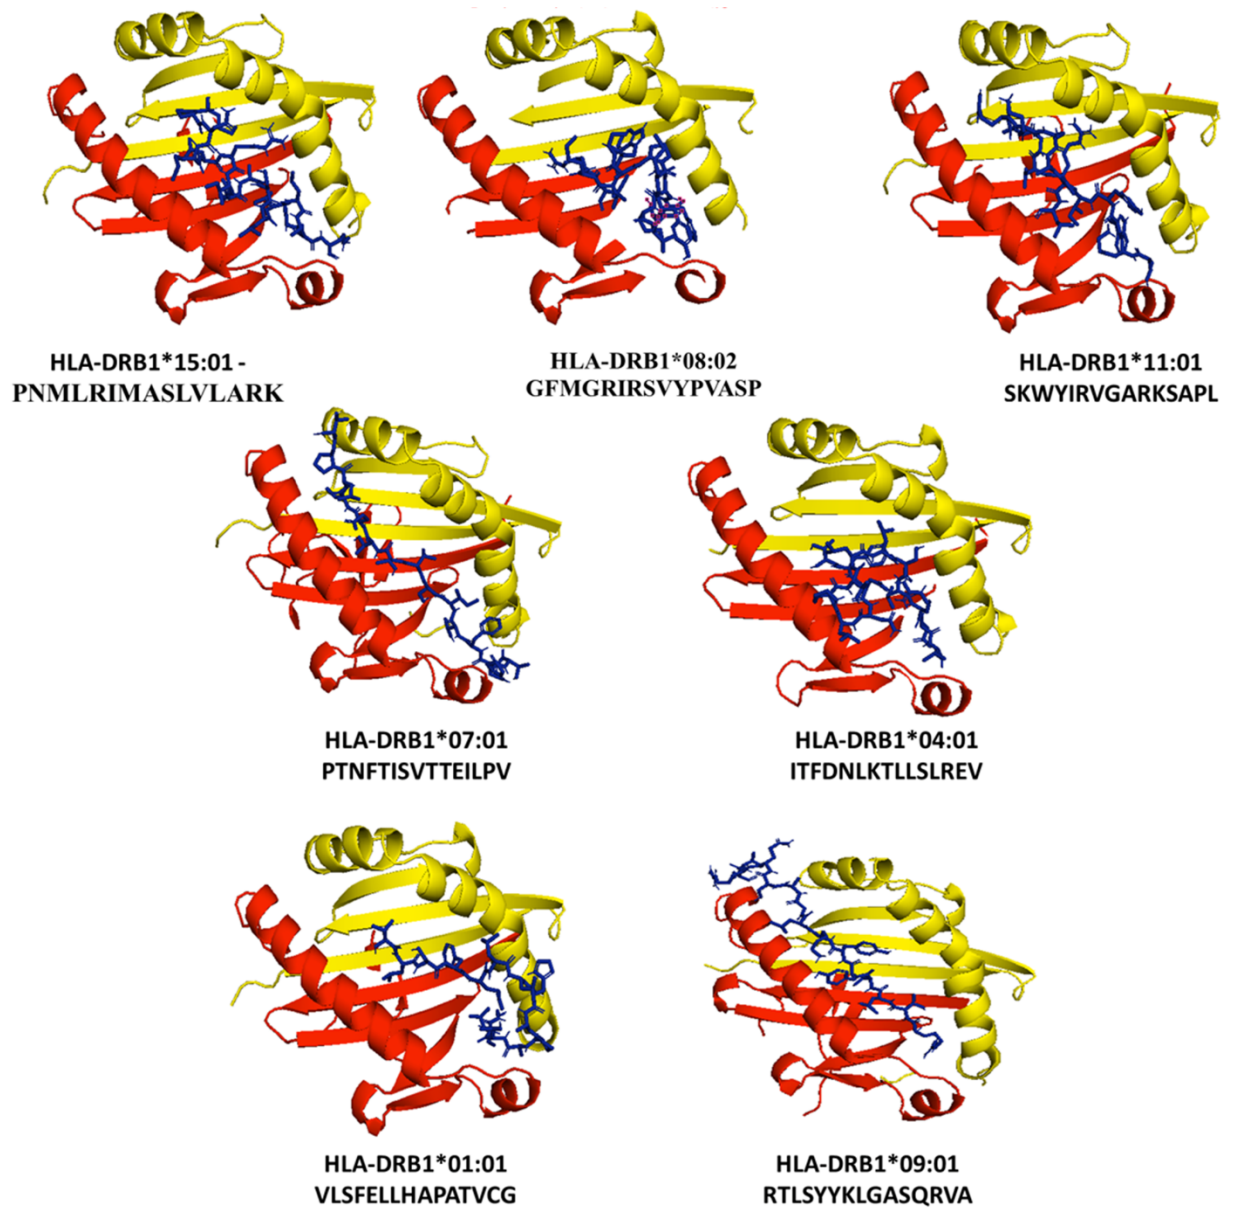

Supplementary Figure S2b: The molecular interaction of the screened CTL epitopes with the epitope binding groove of HLA-II molecules.

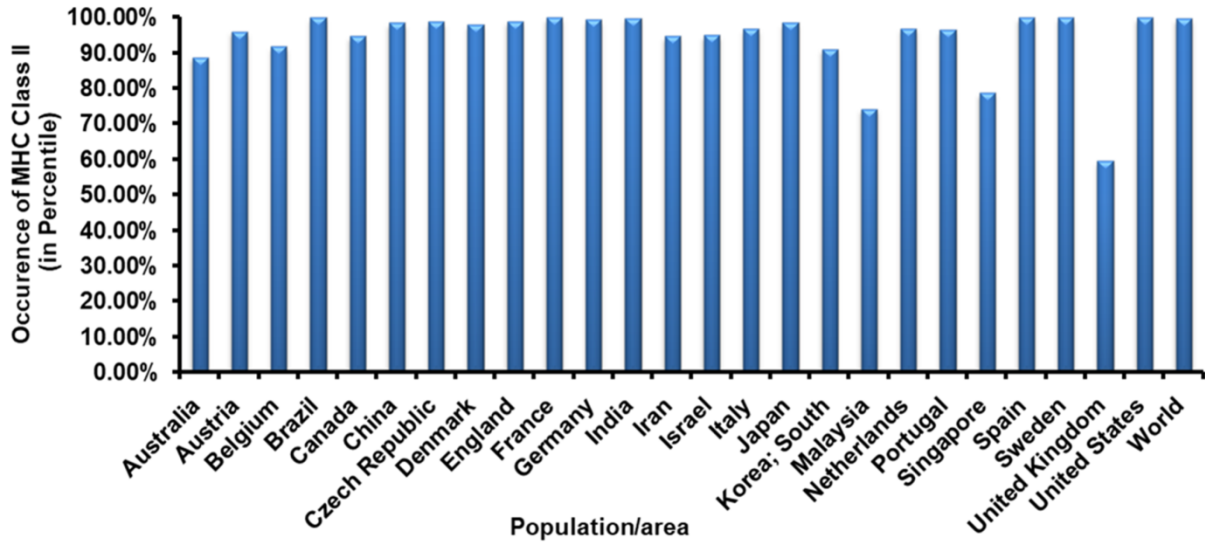

Supplementary Figure S3: Population Coverage of HLA class I for whom the best antigenic epitopes were screened in various countries severely affected by COVID-19 in the world.

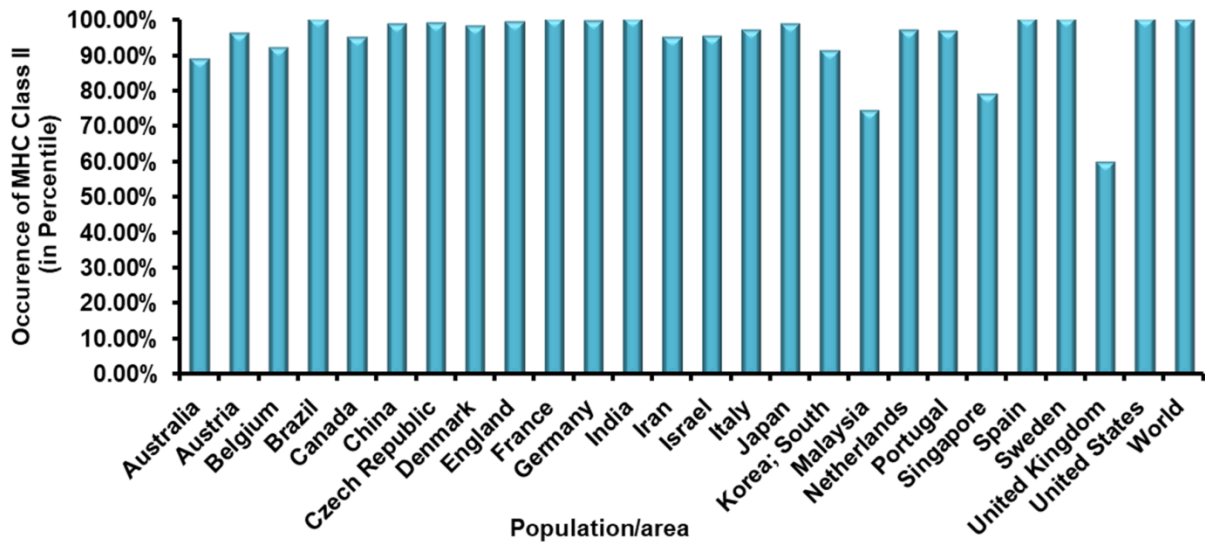

Supplementary Figure S4: Population Coverage of HLA class II for whom the best antigenic epitopes were screened in various countries severely affected by COVID-19 in the world.

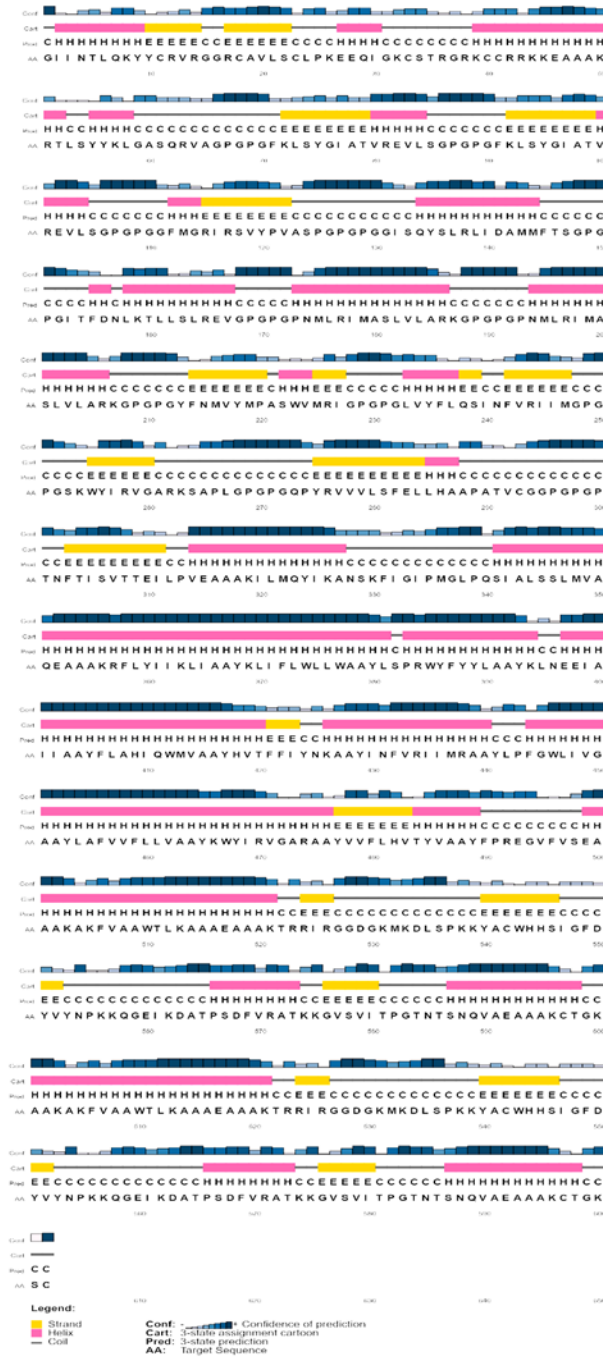

**Supplementary Figure S5. Secondary Structure prediction result of the SARS-CoV-2 multi-epitope vaccine as predicted by PSI-PRED server.**

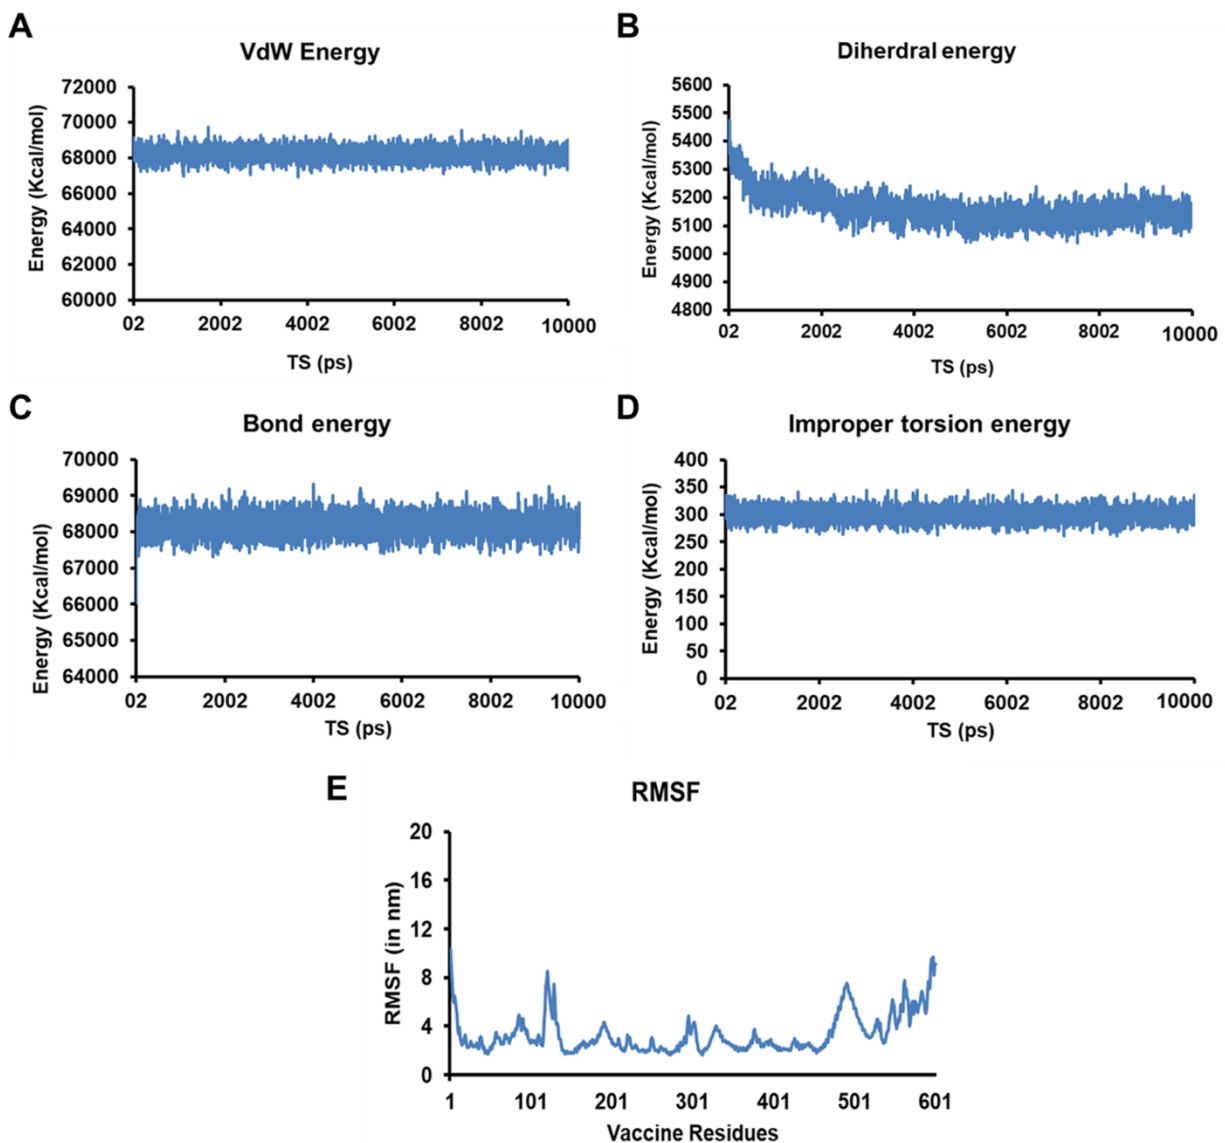

Supplementary Figure S6. (A-D) Energy plots depicting the vanderwaal's energy (A), dihedral angle energy (B), improper dihedral energy (C) and bond energy (D) of the SARS-CoV-2 multi-epitope vaccine during the 10 ns molecular dynamic simulation analysis. (E) Root mean square fluctuation as observed in the residues of the vaccine construct in 10ns duration.

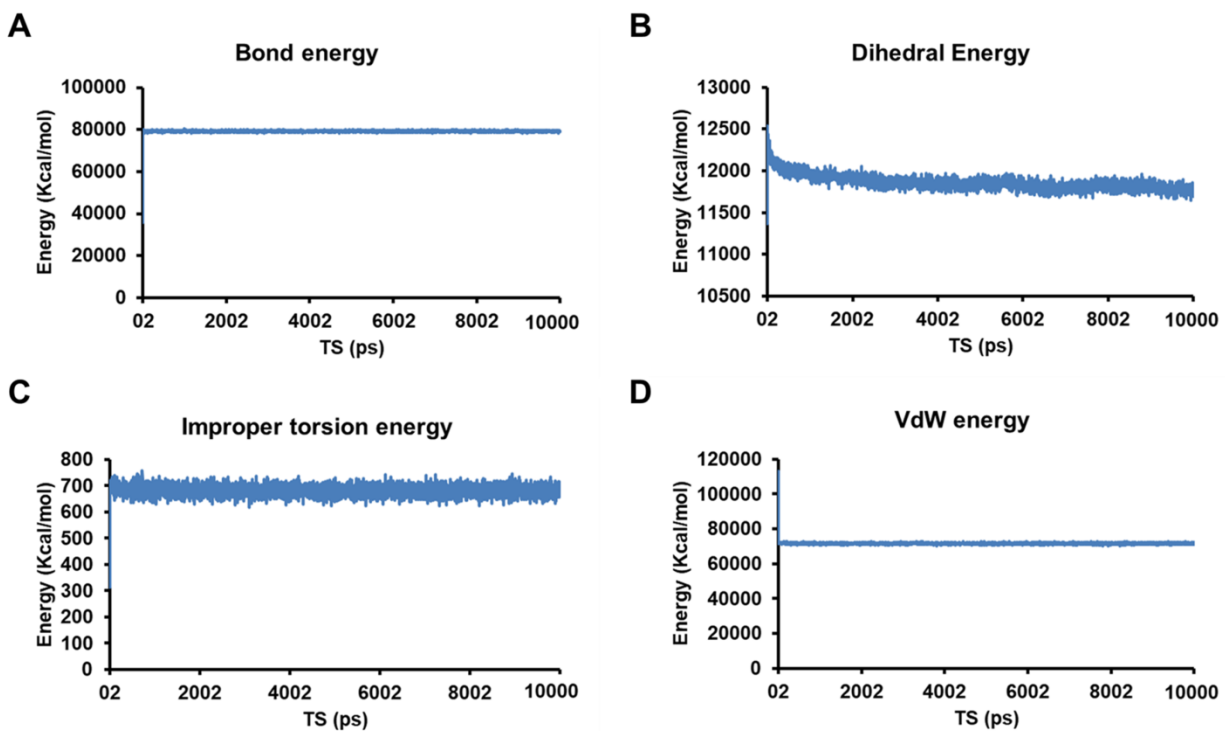

Supplementary Figure S7. (A-D) Energy plots depicting the vanderwaal's energy (A), dihedral angle energy (B), improper dihedral energy (C) and bond energy (D) of the SARS-CoV-2 multi-epitope vaccine and TLR3 complex during the 10 ns molecular dynamic simulation analysis.

**Supplementary Table S1. List of Helper T-cell epitopes of SARS-CoV-2 antigenic proteins selected for the multi-epitope vaccine construct with the percentile rank, antigenicity score and allergenicity prediction.**

| SARS-CoV-2 proteins                                                | Position    | HLA alleles                      | Method                                | Epitope Sequence        | percentile_rank | adjusted_rank | Antigenicity Score | Allergenicity (AlgPred) |
|--------------------------------------------------------------------|-------------|----------------------------------|---------------------------------------|-------------------------|-----------------|---------------|--------------------|-------------------------|
| M glycoprotein                                                     | 174         | HLA-DRB1*09:01                   | Consensus (comb.lib./simm/nn)         | RTLSYYKLG ASQRVA        | 0.06            | 0.06          | 0.564<br>4         | NON ALLERGEN            |
| ORF1ab [Helicase (Hel)]                                            | 5469        | HLA-DQA1*04:01/DQB1*04:01        | NetMHCI Ipan                          | FKLSYGIAT VREVLS        | 0.89            | 0.89          | 0.778<br>3         | NON ALLERGEN            |
| ORF1ab [Helicase (Hel)]                                            | 5469        | HLA-DQA1*04:02/DQB1*04:02        | NetMHCI Ipan                          | FKLSYGIAT VREVLS        | 0.89            | 0.89          | 0.778<br>3         | NON ALLERGEN            |
| ORF1ab (Non-structural protein 2_nsp2)                             | 295         | HLA-DRB1*08:02                   | Consensus (simm/nn/s turniolo)        | GFMGRIRSV YPVASP        | 0.64            | 0.64          | 0.713<br>1         | NON ALLERGEN            |
| ORF1ab(Non-structural protein 2_nsp2)                              | 572         | <b>HLA-DQA1*01:01/DQB1*02:01</b> | NetMHCI Ipan                          | GISQYSLRLI DAMMF        | 0.66            | 0.66          | 0.719<br>5         | NON ALLERGEN            |
| ORF1ab (Non-structural protein 2_nsp2)                             | 574         | HLA-DQA1*01:02/DQB1*02:02        | NetMHCI Ipan                          | SQYSLRLID AMMFTS        | 0.33            | 0.33          | 0.727<br>6         | NON ALLERGEN            |
| ORF1ab Non-structural protein 6 (nsp6)                             | 3649        | HLA-DQA1*05:01/DQB1*05:01        | NetMHCI Ipan                          | YFNMVYMP ASWVMRI        | 0.19            | 0.19          | 0.724<br>4         | NON ALLERGEN            |
| ORF1ab RNA-directed RNA polymerase (RdRp)                          | 5019        | HLA-DPA1*03:01/DPB1*03:01        | NetMHCI Ipan                          | PNMLRIMAS LVLARK        | 0.06            | 0.06          | 0.412<br>8         | NON ALLERGEN            |
| <b>ORF1ab RNA-directed RNA polymerase (RdRp) (H8 model.000.06)</b> | <b>5019</b> | <b>HLA-DRB1*15:01</b>            | <b>Consensus (simm/nn/s turniolo)</b> | <b>PNMLRIMAS LVLARK</b> | <b>0.01</b>     | <b>0.01</b>   | <b>0.412<br/>8</b> | <b>NON ALLERGEN</b>     |
| <b>ORF1ab Papain-like proteinase</b>                               | <b>1551</b> | <b>HLA-DRB1*04:01</b>            | <b>Consensus (simm/nn/s turniolo)</b> | <b>ITFDNLKTL LSLREV</b> | <b>0.33</b>     | <b>0.33</b>   | <b>0.823<br/>4</b> | <b>NON ALLERGEN</b>     |
| ORF3a protein                                                      | 111         | HLA-DPA1*02:01/DPB1*02:01        | NetMHCI Ipan                          | LVIYFLQSIN FVRIIM       | 0.09            | 0.09          | 0.518<br>6         | NON ALLERGEN            |
| ORF8 protein                                                       | 43          | HLA-DRB1*11:01                   | Consensus (simm/nn/s turniolo)        | SKWYIRVG ARKSAPL        | 0.72            | 0.72          | 0.882<br>9         | NON ALLERGEN            |
| S protein                                                          | 506         | HLA-DPA1*01:03/DPB1*01:01        | NetMHCI Ipan                          | QPYRVVVL SFELLHA        | 0.29            | 0.29          | 0.910<br>9         | NON ALLERGEN            |
| <b>S protein</b>                                                   | <b>512</b>  | <b>HLA-DRB1*01:01</b>            | <b>Consensus (comb.lib./simm/nn)</b>  | <b>VLSFELLHA PATVCG</b> | <b>0.03</b>     | <b>0.03</b>   | <b>0.478<br/>4</b> | <b>NON ALLERGEN</b>     |
| S protein                                                          | 715         | HLA-DRB1*07:01                   | Consensus (comb.lib./simm/nn)         | PTNFTISVTT EILPV        | 0.51            | 0.51          | 1.134<br>9         | NON ALLERGEN            |

**Supplementary Table S2. List of Cytotoxic T-cell epitopes of SARS-CoV-2 antigenic proteins selected for the multi-epitope vaccine construct with the percentile rank, binding level, immunogenicity score, antigenicity score and allergenicity prediction.**

| SARS-CoV-2 Protein                       | Start genomic point | HLA Allele  | Epitope       | Score    | Aff(nM) | %Rank  | Binding Level | Antigenicity score | Immunogenicity Score | Allergenicity                                                                                              |
|------------------------------------------|---------------------|-------------|---------------|----------|---------|--------|---------------|--------------------|----------------------|------------------------------------------------------------------------------------------------------------|
| M Protein                                | 44                  | HLA-A*24:02 | RFLYIIKL<br>I | 0.496296 | 232.8   | 0.4035 | SB            | 0.4257             | 0.24108              | PROBABLE NON-ALLERGEN<br>The nearest protein is: UniProtKB accession number O00626 defined as non-allergen |
| M Protein                                | 50                  | HLA-B*58:01 | KLIFLWL<br>LW | 0.588682 | 85.7    | 0.4281 | SB            | 0.4968             | 0.34287              | PROBABLE NON-ALLERGEN<br>The nearest protein is: UniProtKB accession number P60140 defined as non-allergen |
| N Protein                                | 104                 | HLA-A*01:01 | LSPRWYF<br>YY | 0.59866  | 76.9    | 0.073  | SB            | 1.2832             | 0.36094              | PROBABLE NON-ALLERGEN<br>The nearest protein is: UniProtKB accession number Q0VD83 defined as non-allergen |
| N Protein                                | 105                 | HLA-B*07:02 | SPRWYFY<br>YL | 0.748063 | 15.3    | 0.0496 | SB            | 0.734              | 0.34101              | PROBABLE NON-ALLERGEN<br>The nearest protein is: UniProtKB accession number Q7XAQ6 defined as non-allergen |
| ORF1ab (Non-structural protein 2_nsp2)   | 468                 | HLA-A*02:01 | KLNEEIAI<br>I | 0.673256 | 34.3    | 0.4552 | SB            | 0.6394             | 0.43221              | PROBABLE NON-ALLERGEN<br>The nearest protein is: UniProtKB accession number A2Z5D8 defined as non-allergen |
| ORF1ab (Non-structural protein 4 (nsp4)) | 3122                | HLA-A*02:06 | FLAHIQW<br>MV | 0.914969 | 2.5     | 0.0074 | SB            | 0.8064             | 0.38891              | PROBABLE NON-ALLERGEN<br>The nearest protein is: UniProtKB accession number P31358 defined as non-allergen |
| ORF3a Protein                            | 227                 | HLA-A*03:01 | HVTFFIY<br>NK | 0.544282 | 138.5   | 0.4821 | SB            | 0.9862             | 0.36278              | PROBABLE NON-ALLERGEN<br>The nearest protein is: UniProtKB accession number O43852 defined as non-allergen |
| ORF3a Protein                            | 227                 | HLA-A*11:01 | HVTFFIY<br>NK | 0.759484 | 13.5    | 0.0517 | SB            | 0.9862             | 0.36278              | PROBABLE NON-ALLERGEN<br>The nearest protein is: UniProtKB accession number O43852 defined as non-allergen |
| ORF3a Protein                            | 118                 | HLA-A*33:01 | INFVRIIM<br>R | 0.538132 | 148     | 0.3814 | SB            | 0.7646             | 0.26494              | PROBABLE NON-ALLERGEN<br>The nearest protein is: UniProtKB accession number O15511 defined as non-allergen |

|                  |      |             |               |          |        |        |    |        |         |                                                                                                            |
|------------------|------|-------------|---------------|----------|--------|--------|----|--------|---------|------------------------------------------------------------------------------------------------------------|
| ORF3a Protein    | 41   | HLA-B*54:01 | LPFGWLI<br>VG | 0.63608  | 51.3   | 0.0762 | SB | 1.981  | 0.4138  | PROBABLE NON-ALLERGEN<br>The nearest protein is: UniProtKB accession number Q156A1 defined as non-allergen |
| ORF4 (E protein) | 21   | HLA-B*51:01 | LAFVVFL<br>LV | 0.305577 | 1832.6 | 0.3161 | SB | 0.7976 | 0.2141  | PROBABLE NON-ALLERGEN<br>The nearest protein is: UniProtKB accession number P60140 defined as non-allergen |
| ORF8 Protein     | 44   | HLA-A*31:01 | KWYIRV<br>GAR | 0.72322  | 20     | 0.1425 | SB | 1.5772 | 0.27344 | PROBABLE NON-ALLERGEN<br>The nearest protein is: UniProtKB accession number Q96PC3 defined as non-allergen |
| S Protein        | 1060 | HLA-A*02:03 | VVFLHVT<br>YV | 0.793601 | 9.3    | 0.1844 | SB | 1.5122 | 0.1278  | PROBABLE NON-ALLERGEN<br>The nearest protein is: UniProtKB accession number Q6UWT4 defined as non-allergen |
| S Protein        | 1089 | HLA-B*35:01 | FPREGVF<br>VS | 0.56001  | 116.8  | 0.3526 | SB | 0.5509 | 0.31233 | PROBABLE NON-ALLERGEN<br>The nearest protein is: UniProtKB accession number P07711 defined as non-allergen |



**Supplementary Table S3. List of B cell Lymphocytes epitopes of SARS-CoV-2 antigenic proteins selected for the multi-epitope vaccine construct with the ABCPred prediction score, antigenicity score and allergenicity prediction.**

| SARS-CoV-2 proteins                        | B cell epitope Sequence | Start position | Score | Antigenicity Score | AllerTop V2  |
|--------------------------------------------|-------------------------|----------------|-------|--------------------|--------------|
| Nucleocapsid                               | TRRIRGGDGKMKDLSP        | 91             | 0.94  | 1.1467             | Non-allergen |
| ORF1ab Guanine-N7 methyltransferase (ExoN) | YACWHHSIGFDYVYNP        | 6149           | 0.96  | 0.9219             | Non-allergen |
| ORF3a                                      | QGEIKDATPSDFVRAT        | 17             | 0.94  | 0.9161             | Non-allergen |
| Surface glycoprotein                       | GVSVITPGTNTSNQVA        | 594            | 0.95  | 0.4651             | Non-allergen |

**Supplementary Table S4. The Lowest energy score obtained for the 30 conformers of TLR3 – Vaccine construct complex as predicted by ClusPro results.**

| Cluster | Members | Representative | Weighted Score |
|---------|---------|----------------|----------------|
| 0       | 35      | Center         | -1227.0        |
|         |         | Lowest Energy  | -1275.4        |
| 1       | 30      | Center         | -1106.4        |
|         |         | Lowest Energy  | -1171.4        |
| 2       | 29      | Center         | -1198.2        |
|         |         | Lowest Energy  | -1198.2        |
| 3       | 25      | Center         | -1036.6        |
|         |         | Lowest Energy  | -1158.1        |
| 4       | 23      | Center         | -1108.9        |
|         |         | Lowest Energy  | -1108.9        |
| 5       | 21      | Center         | -999.0         |
|         |         | Lowest Energy  | -1427.4        |
| 6       | 21      | Center         | -1243.7        |
|         |         | Lowest Energy  | -1243.7        |
| 7       | 20      | Center         | -1030.6        |
|         |         | Lowest Energy  | -1128.3        |
| 8       | 19      | Center         | -1101.4        |
|         |         | Lowest Energy  | -1146.2        |
| 9       | 18      | Center         | -1252.6        |
|         |         | Lowest Energy  | -1287.4        |
| 10      | 17      | Center         | -1202.9        |
|         |         | Lowest Energy  | -1202.9        |
| 11      | 16      | Center         | -1017.1        |
|         |         | Lowest Energy  | -1150.9        |
| 12      | 16      | Center         | -1218.4        |

|    |    |               |         |
|----|----|---------------|---------|
|    |    | Lowest Energy | -1218.4 |
| 13 | 16 | Center        | -1052.3 |
|    |    | Lowest Energy | -1140.9 |
| 14 | 16 | Center        | -1012.1 |
|    |    | Lowest Energy | -1268.0 |
| 15 | 15 | Center        | -1032.3 |
|    |    | Lowest Energy | -1356.2 |
| 16 | 15 | Center        | -1156.2 |
|    |    | Lowest Energy | -1266.9 |
| 17 | 15 | Center        | -1131.0 |
|    |    | Lowest Energy | -1267.3 |
| 18 | 15 | Center        | -1069.0 |
|    |    | Lowest Energy | -1162.9 |
| 19 | 14 | Center        | -1014.0 |
|    |    | Lowest Energy | -1160.3 |
| 20 | 13 | Center        | -1189.0 |
|    |    | Lowest Energy | -1189.0 |
| 21 | 13 | Center        | -1130.0 |
|    |    | Lowest Energy | -1130.0 |
| 22 | 13 | Center        | -1084.9 |
|    |    | Lowest Energy | -1084.9 |
| 23 | 13 | Center        | -1055.6 |
|    |    | Lowest Energy | -1070.5 |
| 24 | 12 | Center        | -1084.9 |
|    |    | Lowest Energy | -1084.9 |
| 25 | 11 | Center        | -1036.2 |
|    |    | Lowest Energy | -1123.7 |
| 26 | 11 | Center        | -1205.6 |
|    |    | Lowest Energy | -1205.6 |
| 27 | 11 | Center        | -1119.2 |
|    |    | Lowest Energy | -1119.2 |
| 28 | 11 | Center        | -1098.0 |
|    |    | Lowest Energy | -1206.7 |
| 29 | 11 | Center        | -1019.6 |
|    |    | Lowest Energy | -1077.6 |

**Supplementary Data S1. Codon optimized and adapted cDNA sequence of the SARD-CoV multi-epitope vaccine construct.**

GGTATCATCAACACCCTGCAGAAATACTACTGCCGTGTTTCGTGGTGGTTCG 50  
TTGCGCTGTTCTGTCTTGCCTGCCGAAAGAAGAACAGATCGGTAAATGCT 100  
CTACCCGTGGTCGTAAATGCTGCCGTCGTAAAAAAGAAGCTGCTGCTAAA 150  
CGTACCCTGTCTTACTACAAACTGGGTGCTTCTCAGCGTGTTCGGGTCC 200  
GGGCCCGGGCTTCAAACCTGTCTTACGGTATCGCTACCGTTCGTGAAGTTC 250  
TGTCGGGTCCGGGCCCGGGCTTCAAACCTGTCTTACGGTATCGCTACCGTT 300  
CGTGAAGTTCTGTCCGGTCCGGGTCCAGGTGGCTTCATGGGTTCGTATACG 350  
TTCTGTTTACCCGGTTGCTTCTCCGGGTCCGGGTCCGGGTGGTATCTCTC 400  
AGTACTCTCTGCGTCTGATCGACGCTATGATGTTACCTCTGGTCCGGGT 450  
CCGGGTATCACCTTCGACAACCTGAAAACCCTGCTGTCTCTGCGTGAAGT 500  
TGGTCCGGGTCCGGGTCCGAACATGCTGCGTATCATGGCTTCTCTGGTTC 550  
TGGCTCGTAAAGGTCCGGGTCCGGGTCCGAACATGCTGCGTATCATGGCT 600  
TCTCTGGTTCTGGCTCGTAAAGGTCCGGGTCCGGGTACTTCAACATGGT 650  
TTACATGCCGGCTTCTTGGGTATGCGTATCGGTCCGGGTCCAGGGCTGG 700  
TATACTTCCTGCAATCTATCAACTTCGTTTCGTATCATCATGGGTCCGGGT 750  
CCGGGTCTAAATGGTACATCCGTGTTGGTGCTCGTAAATCTGCTCCGCT 800  
GGGTCCGGGTCCGGGTCCAGCCGTACCGTGTGTTGTTCTGTCTTTCGAAC 850  
TGCTGCACGCTGCTCCGGCTACCGTTTGCGGTGGTCCGGGTCCGGGTCCG 900  
ACCAACTTCACCATCTCTGTTACCACCGAAATCCTGCCGGTTGAAGCTGC 950  
TGCTAAAATCCTGATGCAGTACATCAAAGCTAACTCTAAATTCATCGGTA 1000  
TCCCGATGGGTCTGCCGCAGTCTATCGCTCTGTCTTCTCTGATGGTTGCT 1050  
CAGGAAGCTGCTGCTAAACGTTTCCCTGTACATCATCAAACCTGATCGCTGC 1100  
TTACAAACTGATCTTCCCTGTGGCTGCTGTGGGCTGCTTACCTGTCTCCGC 1150  
GTTGGTACTTCTACTACCTGGCTGCTTACAAACTGAACGAAGAAATCGCT 1200  
ATCATCGCTGCTTACTTCCTGGCTCACATCCAGTGGATGGTTGCTGCTTA 1250  
CCACGTTACCTTCTTCATCTACAACAAAGCTGCTTACATCAAACCTTCGTT 1300  
GTATCATCATGCGTGCTGCTTACCTGCCGTTCCGGTTGGCTGATCGTTGGT 1350  
GCTGCTTACCTGGCTTTCGTTGTTTTCCCTGCTGGTTGCTGCTTACAAATG 1400  
GTACATCCGTGTTGGTCTCGTGCTGCTTACGTTGTTTTCCCTGCACGTTA 1450  
CCTACGTTGCTGCTTACTTCCCGCGTGAGGGTGTGTTTCGTCTCTGAAGCT 1500  
GCTGCTAAAGCTAAATTCGTTGCTGCTTGGACCCTGAAAGCTGCTGCTGA 1550  
AGCTGCTGCTAAAACCCGTCGTATCCGTGGTGGTGACGGTAAAATGAAAG 1600  
ACCTGTCTCCGAAAAAATACGCTTGTGGCACCCTCTATCGGTTTCGAC 1650  
TACGTTTACAACCCGAAAAAACAGGGTGAATCAAAGACGCTACCCCGTC 1700  
TGACTTCGTTTCGTGCTACCAAAAAAGGTGTTTCTGTTATCACCCCGGGTA 1750  
CCAACACCTCTAACCCAGGTTGCTGAAGCTGCTGCTAAATGCACCCGGTAAA 1800  
TCTTGC
